# Supplementary material
Source: Royal Society of Chemistry journal article supplement (doi:10.1039/d5lf00398a)
Supplement: d5lf00398a1.pdf [file d5lf00398a1.pdf]

## Supplementary Information

### Photo-deposition of $\text{Cu}_2\text{O}$ on Pre-Annealed ZnO Nanorods Yields pn-Type Heterostructures with Enhanced Photocatalytic Activity

*Fredric G. Svensson, Erik Djurberg, Yige Yan, Seohan Kim, Jiri Henych, Jakub Tolasz, Frederic Dappozze, Stephane Parola, Chantal Guillard, Bozhidar I. Stefanov, and Lars Österlund\**

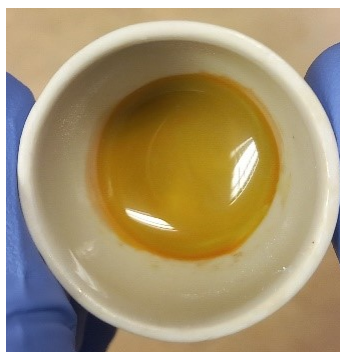

**Fig. S1** The reaction mixture after the photo-deposition reaction.

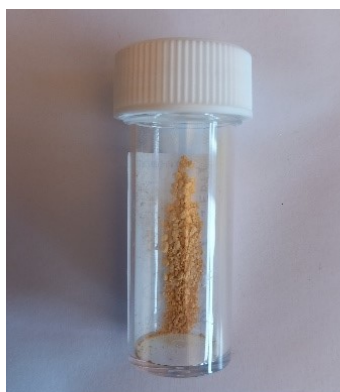

**Fig. S2** Digital photograph of the washed and dried  $\text{Cu}_2\text{O}@Z\text{nO}$  powder.

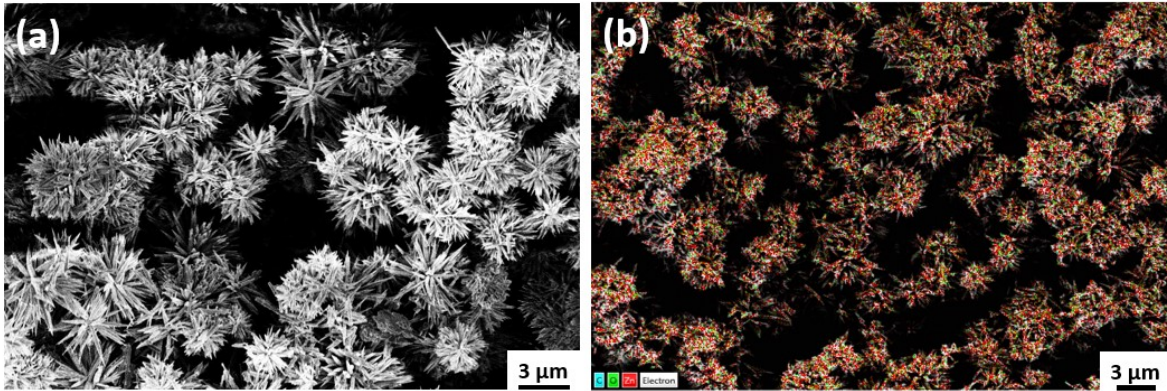

**Fig. S3** (a) Representative SEM micrograph of as-prepared ZnO sea urchin-like structures. (b) Composite EDS elemental map of as-prepared ZnO, indicating only presence of zinc, oxygen, and carbon (from the carbon tape).

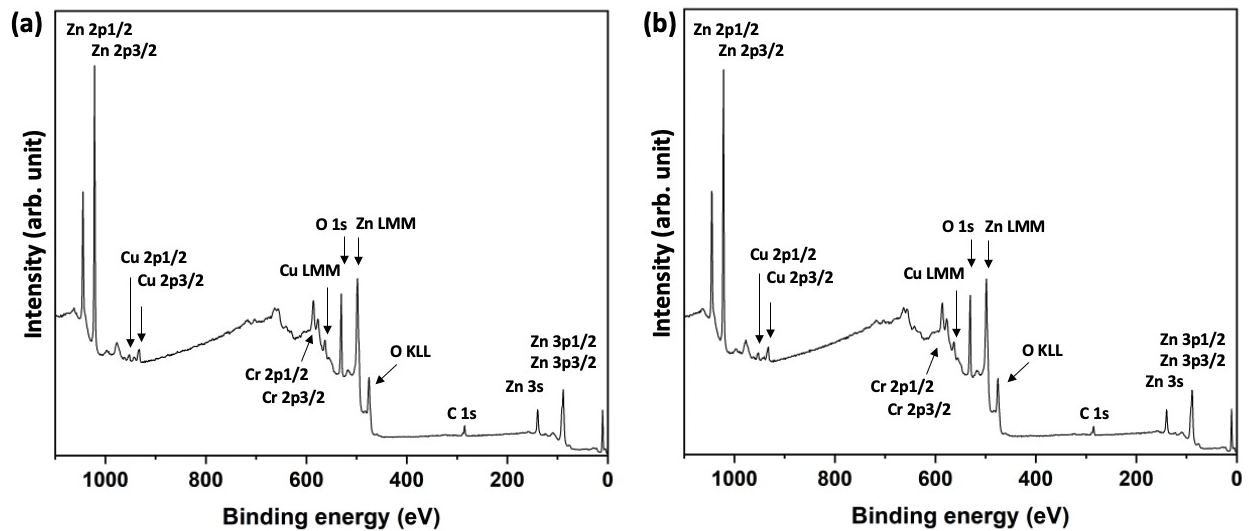

**Fig. S4** XPS survey spectra of (a) Cu<sub>2</sub>O@ZnO (as-prepared) and (b) Cu<sub>2</sub>O@ZnO (post-heated).

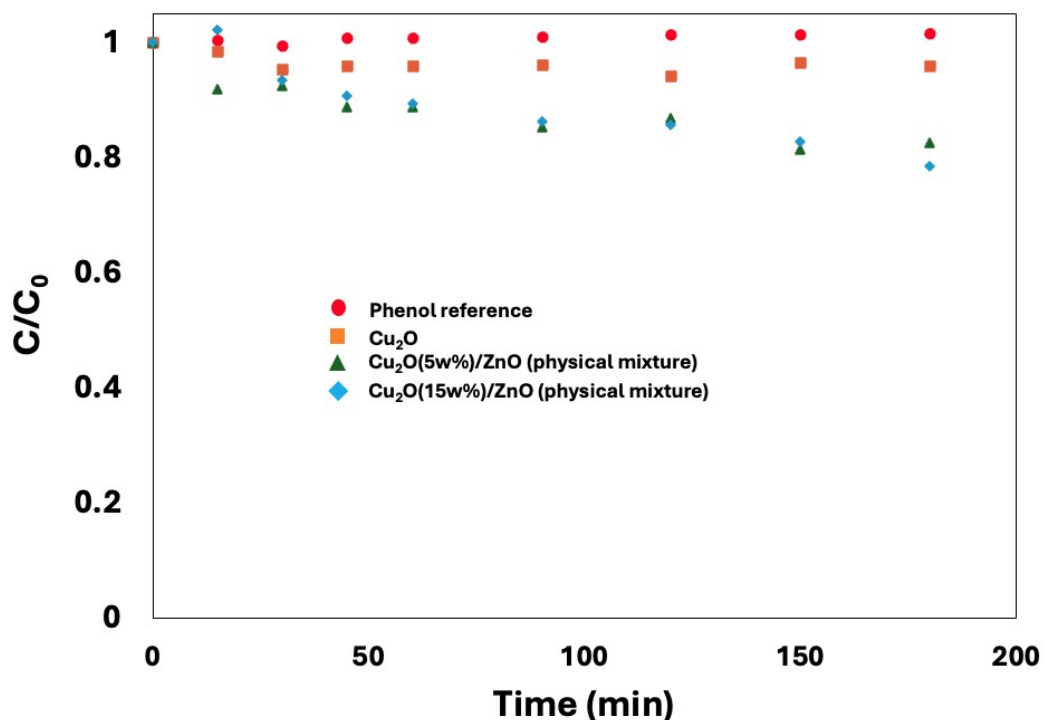

**Fig. S5** Degradation of phenol in absence of catalyst, with only Cu<sub>2</sub>O, physical mixture of 5 w% Cu<sub>2</sub>O with ZnO (as-prepared), and 15 w% Cu<sub>2</sub>O with ZnO (as-prepared).

**Table S1.** Concentration and binding energy the different components of the deconvoluted Cu 2p<sub>3/2</sub> and O 1s high-resolution XPS spectra.

| Sample                                                    | Concentration (at.)/ Binding energy (eV) |                          |                                        |                                                               |                                       |
|-----------------------------------------------------------|------------------------------------------|--------------------------|----------------------------------------|---------------------------------------------------------------|---------------------------------------|
|                                                           | Cu(I) 2p <sub>3/2</sub>                  | Cu(II) 2p <sub>3/2</sub> | O 1s (O <sub>latt</sub> ) <sup>a</sup> | O 1s (O <sub>def</sub> /O <sub>OH,strong</sub> ) <sup>b</sup> | O 1s (O <sub>ads</sub> ) <sup>c</sup> |
| ZnO (as-prepared)                                         | -                                        | -                        | 55 % / 529.9 eV                        | 39 % / 530.8 eV                                               | 6 % / 531.7 eV                        |
| ZnO post-heated (30 min at 500°C)                         | -                                        | -                        | 61 % / 530.1 eV                        | 34 % / 531.1 eV                                               | 5 % / 531.9 eV                        |
| Cu <sub>2</sub> O@ZnO (post-heated before photocatalysis) | 67 % / 931.6 eV                          | 33 % / 933.6 eV          | 66 % / 529.8 eV                        | 30 % / 530.8 eV                                               | 3 % / 531.8 eV                        |
| Cu <sub>2</sub> O@ZnO (post-heated after photocatalysis)  | 67 % / 931.7 eV                          | 33 % / 933.1 eV          | 62 % / 530.0 eV                        | 33 % / 530.6 eV                                               | 5 % / 531.8 eV                        |

<sup>a)</sup> Lattice oxygen (O<sup>2-</sup> in metal oxide)

<sup>b)</sup> Defect-associated oxygen and/or strongly bound surface hydroxyls

c) Adsorbed oxygen species (e.g., weakly bound OH, H<sub>2</sub>O, carbonates, organics)
